# Supplementary material for: Flavour-enhanced cortisol release during gum chewing
Source: PLOS journal article supplement (doi:10.1371/journal.pone.0173475), 2017-04-05
Supplement: S2 (10.1371/journal.pone.0173475.s002) [file journal.pone.0173475.s002]

平成 2 4 年 9 月 1 4 日  
September 14, Heisei24

倫理審査結果通知書  
Ethic judgement results notification

所 属 歯科口腔外科学  
Affiliation oral science and maxillofacial surgery  
実施責任者 主任教授 浦出 雅裕 殿  
implementation supervisor Chief Professor Prof. Masahiro urade

兵庫医科大学  
Hyogo college of medicine  
学長 中西 憲  
Vice-Chancellor Kenji Nakanishi

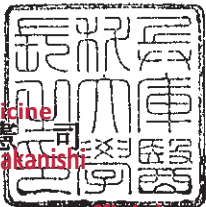

official seal

受付番号 第 1318 号  
The reception desk number : 1318th

研究等課題名 味や香りの変化がガム咀嚼時のストレスに及ぼす影響  
Research , etc. Subject The influence that the change of taste and the odor gives to stress by the gum-chewing

さきに申請のあった上記研究等課題について平成 2 4 年 9 月 4 日の倫理委員  
会で審査し、下記のとおり判定しましたので、倫理委員会規程第 8 条第 4 項の  
規程に基づき、通知します。 We examine about the research theme in advance of the application mentioned  
above in an ethics committee of September 4, Heisei 24, we determined Based on  
official regulations of ethics committee official regulations Article 8 Clause 4, as  
follows. We notify you.

|                              |                                                                                                                                                                                 |
|------------------------------|---------------------------------------------------------------------------------------------------------------------------------------------------------------------------------|
| 判定<br>Decision               | <div>承認<br/>Approval</div> <div>承認<br/>Disapproval</div> <div>条件付承認<br/>Conditioning approval</div> <div>非該当<br/>Non-pertinence</div> <div>変更の勧告<br/>Advice of the change</div> |
| 理由又は勧告<br>A reason or advice |                                                                                                                                                                                 |
