# Supplementary material for: Flavour-enhanced cortisol release during gum chewing
Source: PLoS One. 2017 Apr 5;12(4):e0173475. doi: 10.1371/journal.pone.0173475 (PMC5381771; doi:10.1371/journal.pone.0173475)
Supplement: S3 Text — (XLSX) [file pone.0173475.s005.xlsx]

## Sheet: exp 1 data
Column	Line	patid	@10min	@20min	@30min	@60min	rest	chew	justA	pat	time	result	tube	Salivette
E	10	1	6.378	2.54	3.21	1.473	2.374	10.738	4.688	1	1	2.374	0.25	0.74
D	8	2	0.288	0.637	0.304	0.197	1.119	8.725	0.451	2	1	1.119	0.47	0.85
E	3	3	2.409	1.452	0.791	1.174	0.462	5.236	0.715	3	1	0.462	0.99	0.31
G	7	4	0.494	0.31	0.421	0.224	1.058	4.314	0.821	4	1	1.058	0.11	0
B	11	5	0.214	0.304	0.181	0.079	0.975	7.656	0.45	5	1	0.975	0.015	0.085
D	1	6	1.297	1.026	0.769	0.121	1.457	5.083	1.275	6	1	1.457
F	5	7	0.281	0.112	0.124	0.528	0.085	1.563	0.19	7	1	0.085	0.13	0.03
F	12	8	0.008	1.022	0.239	0.919	1.886	4.147	0.006	8	1	1.886	0.485	0
H	9	9	0.419	0.61	0.309	0.29	0.161	1.084	0.403	9	1	0.161	0.055	0.08
B	4	10	0.587	0.241	0.296	0.046	0.447	4.688	1.192	10	1	0.447	0.31	0.855
H	2	11	0.004	0.71	0.782	0.729		0.096	0.055	11	1		5.29	10.83
C	6	12	1.046	0.573	0.653	1.172	1.261	6.577	1.696	12	1	1.261	4.875	0.195
										1	2	10.738	0.805	0.415
										2	2	8.725	6.305	3.8
										3	2	5.236
										4	2	4.314
										5	2	7.656
										6	2	5.083
										7	2	1.563
										8	2	4.147
										9	2	1.084
										10	2	4.688
										11	2	0.096
										12	2	6.577
										1	3	4.688
										2	3	0.451
										3	3	0.715
										4	3	0.821
										5	3	0.45
										6	3	1.275
										7	3	0.19
										8	3	0.006
										9	3	0.403
										10	3	1.192
										11	3	0.055
										12	3	1.696
										1	4	6.378
										2	4	0.288
										3	4	2.409
										4	4	0.494
										5	4	0.214
										6	4	1.297
										7	4	0.281
										8	4	0.008
										9	4	0.419
										10	4	0.587
										11	4	0.004
										12	4	1.046
										1	5	2.54
										2	5	0.637
										3	5	1.452
										4	5	0.31
										5	5	0.304
										6	5	1.026
										7	5	0.112
										8	5	1.022
										9	5	0.61
										10	5	0.241
										11	5	0.71
										12	5	0.573
										1	6	3.21
										2	6	0.304
										3	6	0.791
										4	6	0.421
										5	6	0.181
										6	6	0.769
										7	6	0.124
										8	6	0.239
										9	6	0.309
										10	6	0.296
										11	6	0.782
										12	6	0.653
										1	7	1.473
										2	7	0.197
										3	7	1.174
										4	7	0.224
										5	7	0.079
										6	7	0.121
										7	7	0.528
										8	7	0.919
										9	7	0.29
										10	7	0.046
										11	7	0.729
										12	7	1.172
