# Supplementary material for: Flavour-enhanced cortisol release during gum chewing
Source: PLoS One. 2017 Apr 5;12(4):e0173475. doi: 10.1371/journal.pone.0173475 (PMC5381771; doi:10.1371/journal.pone.0173475)
Supplement: S4 Text — (XLSX) [file pone.0173475.s006.xlsx]

## Sheet: exp 2 data
Ptid	Result_aveControl	Result_aveF	Result_aveFT	Result_aveGB	Result_aveT	VAS odor F	VAS odor FT	VAS odor GB	VAS odor T	VAS taste F	VAS taste FT	VAS taste GB	VAS taste T	Cortisol gross weight Control	Cortisol gross weight F	Cortisol gross weight FT	Cortisol gross weight GB	Cortisol gross weight T	Quantity of total saliva Control	Quantity of total saliva F	Quantity of total saliva FT	Quantity of total saliva GB	Quantity of total saliva T
22	4.52	1.645	30.72	2.615	4.245	54	61		68	61	78		15		4.67901	295.084	7.5248	37.5078		2.84438	9.60559	2.87755	8.83577
46		1.3625	10.9675	3.86	5.57			17	68			17	68		2.73927	69.9577	1.52703	4.05477		2.01048	6.37863	0.3956	0.72797
73		2.11	18.5325	2.075	3.875	89	49	14	47	2	32	15	57		4.22991	129.305	8.73653	25.2203	0.6689	2.0047	6.97721	4.21038	6.50846
78		5.1525	20.42	2.43	10.615	88	23	44	70	0	88	36	95		6.75816	113.434	9.62985	68.6458		1.31163	5.55507	3.9629	6.46686
95		2.86	11.5325			48	92			18	88				6.22687	96.6739				2.17723	8.38273
96		3.54	40.86			42	97			9	97				9.87279	217.351				2.78893	5.31942
97		0.24	6.62			71	66			20	89				0.10513	11.8338				0.43804	1.78758
48	0.115	0.875	27.65	0.855	27.47	44	99	30	71	24	99	20	80	0.03119	1.26032	133.772	1.22047	83.6483	0.27119	1.44036	4.83804	1.42745	3.04508
39	0.51	1.18	18.58	1.745	4.53			2	3			6	3	0.26222	3.35194	89.4482	3.01492	11.696	0.51416	2.84062	4.81422	1.72775	2.58191
75	0.34	3.9475	6.58	4.525	3.8075	60	95	4	25		95	5	21	0.2891	7.37074	36.041	6.22563	6.48168	0.85031	1.86719	5.47736	1.37583	1.70235
68	0.13	2.145	87.1775	3.925	11.3325	100	100	4	14	42	100	0	67	0.31957	3.87993	352.468	15.1494	26.7107	2.45821	1.80882	4.04311	3.85972	2.357
7	0.6125	2.56	8.6975	1.565	3.1075	2	63	3	22	25	69	3	21	0.40621	2.80596	22.9598	1.31162	10.0457	0.66321	1.09608	2.63982	0.8381	3.23274
21	1.325	0.4575	8.645	1.0075	0.9675	24	78		62	31	59		10	0.58171	1.53736	64.7685	2.78134	5.1572	0.43902	3.36036	7.49202	2.76064	5.33043
23	1.7925	0.36	12.2825	1.5175	1.2875	40	78		64	52	73		16	0.62348	0.64364	51.5282	2.77972	5.37678	0.34783	1.78788	4.19525	1.83178	4.17614
27	0.86	1.7475	7.2925	1.78	3.0725	92	81	13	27	16	94	1	9	0.68396	2.89359	54.7008	2.46323	10.2083	0.7953	1.65584	7.50096	1.38384	3.32248
2	0.355	2.6225	13.5575	3.295	3.175	28	97	1	43	2	99	1	80	0.6917	15.4094	111.619	14.246	23.8871	1.94845	5.87586	8.23301	4.32353	7.52351
37	1.615	10.3975	11.7075	0.73	2.25			0	32			0	32	0.69816	56.0453	107.556	1.42753	10.4362	0.4323	5.39027	9.1869	1.95552	4.63833
43	1.125	1.74	18.895	1.86	12.19			51	50			51	70	0.71447	3.17382	82.9588	2.18417	49.2139	0.63509	1.82404	4.39052	1.17429	4.03723
83	1.6725	13.3375	5.9275	3.345	2.585	14	73	20	41	14	73	11	75	0.74502	56.9738	55.5817	3.02328	11.4687	0.44545	4.2717	9.37692	0.90382	4.43665
90	0.655	1.47	11.085			15	78			11	72			0.76674	2.7	66.3028			1.17059	1.83673	5.98131
36	1.02	10.9025	61.62	1.905	11.0825	70	76	7	32	24	96	7	68	0.84335	17.666	313.458	2.30693	26.9011	0.82681	1.62036	5.08696	1.21099	2.42735
12	2.0325	3.0725	21.4075	1.96	3.5475	94	96	4	52	2	97	3	51	0.89729	6.58903	120.742	2.58099	16.3185	0.44147	2.14452	5.64017	1.31683	4.6
60	4.925	2.205	25.1425	3.545	0.35	46	76	1	3	30	76	1	74	0.92033	4.71969	171.645	7.58754	1.61645	0.18687	2.14045	6.82687	2.14035	4.61844
42	1.2725	1.1425	4.145	0.17	1.455			2	29			5	19	0.92893	5.02561	32.2282	0.32541	2.59837	0.73	4.39878	7.77521	1.91417	1.78582
9	1.615	0.975	6.3075	1.895	6.0925	87	95	5	11	14	95	5	96	0.93359	2.50997	45.4377	4.29126	34.5428	0.57807	2.57432	7.20376	2.26452	5.66972
55	0.89	2.515	26.41	2.16	13.325	62	73	16	62	26	81	14	73	1.05597	5.6894	176.245	6.91985	86.9921	1.18649	2.26219	6.67341	3.20364	6.52849
38	0.8475		5.17	12.735	8.395			36	98			36	98	1.10175		2.9342	19.1463	23.9147	1.3	0.9492	0.56754	1.50344	2.84869
41	1.2475	1.2075	13	3.095	6.43			38	25			38	78	1.12044	2.0005	72.6267	4.55706	15.8826	0.89815	1.65673	5.58667	1.47239	2.47009
89	0.84	2.235	23.1825			73	100			38	100			1.12612	8.65534	216.402			1.34063	3.87264	9.33472
93	1.27	1.2175	23.6025			22	55			91	100			1.1417	2.7875	168.468			0.89898	2.28952	7.1377
24	1.575	0.6625	16.625	1.135	1.5275	66	71		76	65	78		74	1.16285	1.1577	79.4845	1.09031	5.33156	0.73832	1.74747	4.78102	0.96063	3.49038
13	1.1425	2.0925	59.7275	2.61	5.25	33	71	5	27	73	70	5	27	1.29616	1.86736	419.15	3.10099	23.3176	1.13449	0.89241	7.0177	1.18812	4.44144
94	2.4825	3.515	6.835			76	32			24	99			1.30331	5.49794	53.0618			0.525	1.56414	7.76325
11	2.5175	3.3325	55.955	2.13	7.1225	75	78	19	30	12	78	14	39	1.34775	4.20212	393.494	2.09461	30.3546	0.53535	1.26095	7.03232	0.98339	4.26179
8	1.135	4.25	12.105		1.625	86	100	10	44	11	100	10	74	1.36932	8.81139	111.327		6.24339	1.20645	2.07327	9.19682	2.50138	3.84209
88	1.335	2.2675	9.785			57	100			56	89			1.40897	8.25056	46.6293			1.05541	3.63861	4.76538
82	2.17	5.75	21.5775	0.165	2.9125	44	65	18	32	25	63	14	59	1.42892	16.2675	92.6594	0.54343	15.889	0.65849	2.82913	4.29426	3.29352	5.45545
92	1.4175	1.17	10.4975			78	84			26	89			1.58288	3.22324	75.8496			1.11667	2.7549	7.22549
4	1.2275	1.0825	11.535	1.47	2.5475	72	90	42	39	44	89	41	74	1.6046	1.89019	67.7269	2.48695	11.3943	1.30721	1.74613	5.87143	1.6918	4.47273
16	3.1525		8.365	3.4675	0.825	88	88	13	11	24	94	12	48	1.62645		72.2768	7.12454	4.29552	0.51592	2.74608	8.64038	2.05466	5.20669
19	2.885	9.555	31.245	2.98	11.625	58	64	4	6	5	89	3	84	1.66774	16.6567	131.834	4.04653	41.6517	0.57807	1.74324	4.21935	1.35789	3.58294
86	3.715	2.695	15.165	2.265	2.2725	24	77	1	33	33	84	1	70	1.69829	5.55381	105.505	5.09625	10.9412	0.45714	2.06078	6.95714	2.25	4.81461
61	4.35	6.18	7.7875	8.2075	6.1425	78	80	2	56	27	79	0	67	1.76197	8.99808	20.9499	5.24341	10.078	0.40505	1.456	2.69019	0.63886	1.64071
34	4.34	11.28	11.33	0.4125	2.45	18	77	30	65	19	88	25	77	1.77052	23.6012	57.3239	0.8631	6.06974	0.40795	2.09231	5.05948	2.09237	2.47744
1	2.67	0.33	16.14			61	97	0	48	11	96	0	71	1.81307	0.89196	137.487			0.67905	2.7029	8.51842	2.42427	5.19304
91	3.2025	17.3	6.685			5	93			3	93			1.9032	37.2948	35.4387			0.59429	2.15577	5.30123
56	1.45	3.85	27.05	0.09	25.7	24	78	28	82	9	85	26	83	1.9045	1.79408	52.691	0.29752	110.796	1.31345	0.46599	1.94791	3.30577	4.31111
3	1.525	1.145	26.7125	0.95	2.47	88	86	69	49	18	80	21	78	1.91714	4.17025	205.834	3.23644	14.2326	1.25714	3.64214	7.70554	3.40678	5.7622
84	1.44	5.4975	37.58	3.345	9.605	48	46	1	19	6	87	1	97	1.91951	5.98762	286.367	7.75461	48.9246	1.33299	1.08915	7.62019	2.31827	5.09366
44	1.64	1.2375	1.525	2.845	12.36			52	75			52	74	1.94949	2.30484	11.2929	4.68072	55.62	1.18871	1.8625	7.40517	1.64524	4.5
45	3.21	0.7975	2.6175	2.565	20.835			15	27			15	69	2.15002	3.40989	14.2262	3.26144	98.6971	0.66979	4.27573	5.43503	1.27152	4.73708
30	1.1625	1.3525	8.315	1.4475	1.6275	49	50	4	12	26	78	3	23	2.22046		92.4897	4.19678	10.6878	1.91007		11.1232	2.89933	6.56701
50	2.72	2.705	9.57	0.015	1.49	53	81	25	36	48	78	25	73	2.23401	1.14485	7.69018	0.03656	6.52931	0.82133	0.42324	0.80357	2.43719	4.38209
5	1.3875	0.22	9.95	1.23	1.06	44	77	15	49	22	76	13	74	2.29258	0.90405	83.5627	4.58195	6.12339	1.65231	4.10932	8.39826	3.72517	5.77679
79	1.415	4.2475	20.48	3.43	5.985	94	94	59	86	1	95	35	85	2.30516	3.73607	176.059	16.2596	38.0371	1.62909	0.87959	8.59665	4.7404	6.35541
40	2.595	1.04	2.7775	0.43				9	46			38	36	2.34271	3.45959	19.6423	0.16702		0.90278	3.32652	7.07194	0.38843	0.58312
53	2.435	0.115	18.065	0.84	32.805	69	85	29	81	50	85	29	84	2.3497	0.08373	135.201	1.50346	136.715	0.96497	0.72807	7.48413	1.78983	4.16752
32	2.45					19	74	0	24	0	73	0	55	2.38602					0.97389
14	1.835	2.91	6.77	1.3225	3.9025	80	100	9	20	46	100	18	80	2.4409	10.6637	59.507	6.20722	25.2542	1.33019	3.6645	8.78981	4.69355	6.4713
69	10.81	0.6	5.4475	8.0175	2.315	12	63	1	3	19	65	0	72	2.51125	2.81308	50.221	4.16684	9.73343	0.23231	4.68847	9.2191	0.51972	4.2045
28	2.4	2.015	38.0425	1.825	7.34	87	88	3	77	0	80	0	77	2.53585	4.84797	380.187	2.7375	42.026	1.0566	2.40594	9.99375	1.5	5.72561
65	1.875	2.985	19.15	0.18	17.5375	24	83	4	15	26	72	4	24	2.63273	8.95209	138.208	0.26454	43.4784	1.40412	2.99903	7.21712	1.46965	2.47917
63	2.785	0.92	36.73	4.0575	1.855	73	86	2	4	27	86	2	11	2.65793	1.40484	192.142	8.70518	5.55621	0.95437	1.527	5.23119	2.14545	2.99526
25	3.0525	1.42	28.4825	3.02	4.095	46	65		53	70	89		23	2.76633	4.3026	199.607	8.54717	15.1122	0.90625	3.03	7.00806	2.83019	3.6904
10	2.365	2.495	8.885	3.4725	2.4925	82	86	1	14	1	85	1	56	2.84459	1.31168	43.5136	3.4725	11.1892	1.20279	0.52572	4.89743	1	4.48916
29	0.9475	1.065	27.7425	1.3175	4.205	41		24	56	35		24	61	2.89311	4.46637	229.017	5.38268	26.1857	3.05341	4.19377	8.2551	4.08553	6.22727
77	20.4625	5.075	13.9825	9.7225	9.95	51	60	6	55	21	60	6	59	2.92038	19.4119	114.462	10.4666	40.5624	0.14272	3.825	8.18609	1.07653	4.07663
76	2.5825	3.565	2.9925	2.7025	2.965	23	29	13	26	17	36	14	75	2.94623	12.3117	16.9801	7.04255	9.88303	1.14085	3.45349	5.67421	2.60594	3.33323
20	2.2575	5.65	1.245	2.9725	19.765	52	94	38	81	44	94	43	87	3.18308	12.8908	8.715	9.18592	117.844	1.41	2.28155	7	3.0903	5.96226
33	8.93					82	94	5	50	4	93	5	34	3.394					0.38007
51	4.06	6.765	13.505	1.29	15.145	65	88	14	64	29	91	13	63	3.45556	17.0265	35.0059	1.90198	37.7004	0.85112	2.51685	2.59207	1.4744	2.4893
15	4.985	2.29	14.4525	3.7625	15.31	96	99	1	15	3	98	2	71	3.46639	3.3302	66.5246	4.47973	68.683	0.69536	1.45424	4.60299	1.19063	4.48615
54	10.97	5.27	54.84	1.505	12.83	70	97	49	66	56	97	50	65	3.58286	10.8933	316.633	1.67189	30.9964	0.32661	2.06703	5.77376	1.11089	2.41593
67	2.085	0.34	27.74	1.435	3.12	50	79	23	23	19	79	22	78	3.71026	1.0096	229.018	4.27647	16.1708	1.7795	2.96941	8.25589	2.98012	5.18294
26	2.94	0.985	6.8825	1.875	3.5225	67	93	27	51	40	94	39	92	3.91687	2.53422	39.295	6.08911	18.4605	1.33227	2.57282	5.7094	3.24752	5.24074
58	7.16	4.185	20.645	3.165	4.1425	70	63	7	53	29	92	7	100	4.37188	8.85332	116.904	5.86201	12.7742	0.6106	2.11549	5.6626	1.85214	3.08368
6	2.32	2.3675	5.2	4.1025	4.465	85	87	0	0	1	86	0	73	4.86502	9.56802	41.2761	9.45818	22.0089	2.09699	4.0414	7.9377	2.30547	4.9292
87	3.94	4.0975	59.1	3.315	0.2	23	54	5	52	18	56	9	80	5.27501	5.1789	412.236	2.45775	0.32884	1.33883	1.26392	6.97524	0.7414	1.64419
52	6.88	0.825	39.705	3.515	15.265	23	88	18	80	13	88	17	84	5.39861	0.74787	113.663	5.13009	49.8203	0.78468	0.9065	2.86269	1.45949	3.26369
64	1.96	0.62	30.13	1.4525	1.52	50	65	1	13	49	69	2	15	6.38547	0.48022	195.121	3.61126	7.89636	3.25789	0.77455	6.47596	2.48624	5.19497
81	1.9125	2.9575	9.4425	1.355	1.6275	11	83	41	63	5	84	40	77	6.39181	14.5305	102.572	3.07366	4.81108	3.34212	4.9131	10.8628	2.26839	2.95612
59	6.47	11.42	18.6175	0.865	3.1825	27	40	4	31	27	69	5	43	6.76144	17.2296	97.3226	3.21766	18.2166	1.04505	1.50872	5.22748	3.71983	5.724
70	4.1325	0.98	8.7175	3.7275	6.06	54	97	6	46	1	98	3	74	7.01706	3.77567	54.7851	2.63219	18.927	1.69802	3.85272	6.2845	0.70615	3.12326
80	5.09	3.18	27.9	1.255	4.165	95	97	18	75	1	98	16	71	7.70658	4.44283	66.69	3.49816	18.894	1.51406	1.39712	2.39032	2.78738	4.53636
72	5.815	0.7775	28.385	6.855	7.7425	32	64	5	14	8	64	6	15	8.65272	2.45379	183.882	21.2175	33.2418	1.488	3.156	6.47815	3.09519	4.29341
35	12.875	3.9025	19.155	2.83	6.015	90	99	5	42	6	99	6	74	9.18393	8.69127	103.42	5.31831	24.8148	0.71332	2.2271	5.39914	1.87926	4.12548
17	13.1075	0.96	8.85	0.3075	4.135	100	83	19	74	12	85	0	90	10.2136	2.35183	74.7241	1.02123	32.4041	0.77922	2.44983	8.4434	3.32107	7.83654
47	6.215	1.975	22.215	0.105	16.435	41	89	8	20	8	100	8	90	12.1243	5.41542	188.922	0.21381	64.8474	1.95082	2.74198	8.50424	2.03631	3.94569
62	14.325	2.555	43.855	1.465	2.42	70	57	7	34	23	42	6	43	12.2067	5.07257	123.415	2.32179	13.4351	0.85213	1.98535	2.81415	1.58484	5.55169
74	5.3825	5.6	12.93	7.6475	7.515	33	50	19	26	1	49	4	54	12.3797	13.7484	69.2375	8.92463	39.4844	2.3	2.45506	5.35479	1.167	5.25408
85	6.2675	1.32	15.57	1.94	3.285	33	65	8	83	4	79	8	74	12.4156	0.92234	69.9561	6.48781	16.474	1.98095	0.69874	4.49301	3.34423	5.01491
66	8.2125	0.165	44.395	0.59	3.8	57	28	16	32	56	11	15	40	13.7296	0.64294	228.388	2.26472	25.3111	1.67179	3.89661	5.14444	3.83851	6.66082
71	20.01	0.9125	40.3	1.57	3.57	12	100	2	49	0	100	2	62	16.9353	1.82862	127.513	6.51999	28.8878	0.84634	2.00397	3.1641	4.15286	8.09182
57	38.945	0.855	34.86	0.73	19.02	74	86	26	47	18	86	15	66	18.9581	1.96958	245.368	1.89331	142.72	0.48679	2.3036	7.03866	2.59358	7.5037
49	19.29	1.7	24.385	0.17	20.105	72	24	42	51	3	96	33	78	20.2891	3.16504	110.834	0.23369	29.6711	1.05179	1.86179	4.54518	1.37463	1.47581
18	18.14	19.56	14.335	4.5775	10.1725	97	97	52	31	48	97	11	80	31.1701	29.1363	75.883	4.11497	23.8073	1.71831	1.48958	5.29355	0.89895	2.34036
31	18.14	19.56	14.335	4.5775	10.1725	97	97	52	31	48	97	11	80	31.1701	29.1363	75.883	4.11497	23.8073	1.71831	1.48958	5.29355	0.89895	2.34036
