# Supplementary material for: Flavour-enhanced cortisol release during gum chewing
Source: PLoS One. 2017 Apr 5;12(4):e0173475. doi: 10.1371/journal.pone.0173475 (PMC5381771; doi:10.1371/journal.pone.0173475)
Supplement: S5 Text — (XLSX) [file pone.0173475.s007.xlsx]

## Sheet: exp 3 data
NUM	patid	txt_ sex	Age	gam kind	Cortisol concentrations <it has been calculated>	Gum kind num_VAS odor	Gum kind num_VAS taste	Gum kind num_ saliva gross weight	Gum kind average _100μg specific gravity
2	103	men	25	fz	25.395	74	86	7.338	0.073
6	104	women	23	fz	6.565	75	90	0.785	0.089
10	105	women	23	fz	15.765	83	83	7.123	0.0973333
14	106	men	31	fz	16.435	75	87	5.808	0.093
18	107	women	24	fz	30.925	87	88	6.612	0.101
22	108	men	25	fz	10.225	82	81	8.433	0.0893333
26	109	men	28	fz	27.015	100	100	4.469	0.0906667
30	110	women	35	fz	25.495	49	48	5.919	0.1
34	111	women	28	fz	9.235	78	78	4.575	0.0966667
38	112	men	31	fz	19.1	81	81	6.921	0.100667
42	113	women	26	fz	29.985	100	100	7.747	0.0893333
46	114	women	35	fz	25.335	78	78	9.03	0.099
50	115	women	30	fz	17.52	82	82	7.671	0.098
55	118	women	25	fz	19.995	91	91	4.706	0.0986667
59	119	men	63	fz	6.21	51	51	8.486	0.100667
63	120	men	47	fz	9.205	97	96	7.423	0.12
67	121	men	42	fz	21.38	67	74	11.241	0.105667
71	122	women	22	fz	20.34	72	71	3.53	0.12
75	123	women	25	fz	25.95	94	94	3.486	0.1
79	124	women	21	fz	9.19	93	93	7.55	0.105667
83	125	women	21	fz	9.63			6.31	0.103333
87	127	women	21	fz	11.715	94	95	2.524	0.101667
91	128	women	35	fz	13.005	72	71	2.433	0.117
95	129	men	25	fz	6.075	79	71	5.601	0.104
99	130	men	27	fz	20.08	96	98	5.804	0.110333
103	131	men	25	fz	13.11	95	95	8.889	0.105667
107	132	women	21	fz	20.675	93	94	4.87	0.102
111	133	women	23	fz	11.395	60	59	7.541	0.102
115	134	women	26	fz	29.075	57	96	2.641	0.100667
119	135	men	34	fz	19.67	26	26	1.977	0.106333
123	136	women	23	fz	5.475	54	47	2.907	0.110667
127	137	men	26	fz	1.69	28	27	4.704	0.106333
131	138	men	25	fz	3.49	70	69	10.623	0.106333
135	139	women	23	fz	11.005	77	77	12.202	0.102333
139	140	men	25	fz	15.95	99	99	8.562	0.100667
143	141	men		fz	9.88	100	88	9.604	0.100667
147	142	women	25	fz	21.98	87	79	11.274	0.103
151	143	men	27	fz	13.16	80	80	6.627	0.099
155	144	women	23	fz	35.94	84	81	8.252	0.103667
159	146	men	24	fz	6.275	76	89	10.447	0.104667
163	147	men	23	fz	21.955	93	93	9.585	0.104667
167	148	men	25	fz	17.625	97	98	8.742	0.103333
171	149	men	38	fz	19.945	81	80	10.472	0.106667
175	150	men	24	fz	6.16	94	93	7.438	0.106333
3	103	men	25	sl	12.95	10	10	4.799
7	104	women	23	sl	12.41	2	4	2.892	0.278333
11	105	women	23	sl	10.435	9	9	4.756	0.101333
15	106	men	31	sl	9.22	21	13	3.951	0.0953333
19	107	women	24	sl	9.735	5	5	5.308	0.0973333
23	108	men	25	sl	6.53	1	0
27	109	men	28	sl	6.71	35	35	4.601	0.0946667
31	110	women	35	sl	7.42	9	8	5.68	0.086
35	111	women	28	sl	8.25	32	10	5.65	0.0933333
39	112	men	31	sl	9.53	2	1	3.661	0.0853333
43	113	women	26	sl	15.6	0	0	4.348	0.1
47	114	women	35	sl	11.375	0	0	5.684	0.1
51	115	women	30	sl	7.385	0	0	4.131	0.086
56	118	women	25	sl	9.175	0	0	3.992	0.103
60	119	men	63	sl	4.45	6	6	9.067	0.0983333
64	120	men	47	sl	3.925	1	1	5.24	0.124667
68	121	men	42	sl	13.22	18	5	5.557	0.124
72	122	women	22	sl	5.89	3	4	2.265	0.0983333
76	123	women	25	sl	9.08	2	2	4.004	0.103
80	124	women	21	sl	4.265	3	2	5.962	0.104
84	125	women	21	sl	6.925			4.254	0.100333
88	127	women	21	sl	3.07	12	12	5.92	0.0956667
92	128	women	35	sl	2.82	0	0	4.974	0.116667
96	129	men	25	sl	6.415	2	0	4.642	0.124667
100	130	men	27	sl	9.08	2	3	2.735	0.104667
104	131	men	25	sl	6.335	10	10	5.192	0.110333
108	132	women	21	sl	6.94	3	2	3.559	0.106667
112	133	women	23	sl	5.39	8	2	4.134	0.102333
116	134	women	26	sl	3.4	8	1	3.714	0.107667
120	135	men	34	sl	6.165	21	21	3.861	0.107333
124	136	women	23	sl	3.89	0	0	3.384	0.107
128	137	men	26	sl	1.26	1	1	5.038	0.104667
132	138	men	25	sl	2.65	2	2	6.542	0.105667
136	139	women	23	sl	2.91	39	35	9.745	0.100333
140	140	men	25	sl	7.23	25	0	8.467	0.102
144	141	men		sl	4.745	23	6	7.311	0.100333
148	142	women	25	sl	3.55	16	16	7.596	0.101
152	143	men	27	sl	9.965	42	0	4.693	0.104667
156	144	women	23	sl	13.565	21	18	5.907	0.103
160	146	men	24	sl	2.965	2	0	8.021	0.105333
164	147	men	23	sl	6.7	1	2	8.211	0.102333
168	148	men	25	sl	4.94	1	1	7.678	0.102667
172	149	men	38	sl	8.525	9	9	6.962	0.103333
176	150	men	24	sl	4.445	2	0	6.236	0.104
